# Supplementary material for: Assessing the Relationship between Vector Indices and Dengue Transmission: A Systematic Review of the Evidence
Source: PLoS Negl Trop Dis. 2014 May 8;8(5):e2848. doi: 10.1371/journal.pntd.0002848 (PMC4014441; doi:10.1371/journal.pntd.0002848)
Supplement: Table S1 — Data extraction table summary for reviewed studies. (XLSX) [file pntd.0002848.s002.xlsx]

## Sheet: Sheet1
Ref no.	Author | Year | Study Popn (size + density)	Study Design | Indices | Case Definition	Objectives	Length of study and frequencies of data collection	Outcome Data / Results	Authors' conclusions
20	Sanchez et al., 2010.	Case-control, block (mean = 50 houses) and neighbourhood (block plus surrounding blocks within 100m) used as units of measure	Usefulness of larval indices (particularly BImax) in identifying high-risk areas for dengue transmission for following month.	Routine surveillance data from May – July 2001 used. IgM cases reported at start of epidemic (June – August 2001). Vector data collection conducted by different vector control groups and may not have been standardized. Upon reporting of dengue cases, surveillance intensified. Calculated sensitivity, specificity, positive predictive value (PPV) and negative predictive value (NPV) for transmission …	Of dengue cases in June, July and August, 89%, 83% and 74% lived in neighbourhoods with at least one block with BImax >4 in preceding month. Sensitivity for BImax in June was 81.8%. July and August was 65% and 62% respectively. PPVs for all indices were low because incidence in population was low.	BImax only consistent predictor of transmission in following month. BI at neighbourhood and block level were poor predictors of dengue transmission in subsequent month, in contrast to Sanchez 2006 study.
	Havana, Cuba (101,484)	BI and BImax at block and neighbourhood level
		IgM serology.
29	Sanchez et al., 2006.	Case-control study using residential block, neighbourhood and municipality as units	Usefulness of larval indices (particularly BImax) in identifying high-risk areas for dengue transmission	Recorded larval stage data from every house within the study area at 2-monthly intervals for 6 months. Data from 3 cycles in 2000: July-Aug (before outbreak) Sep-Oct (during) Nov-Dec (after). Dengue cases confirmed by IgM ELISA, interviewed to establish time of infection.	High correlation (r>0.94) between HI and BI; before outbreak, mean BI and HI were >1 for case neighbourhoods, <1 for controls. During outbreak mean values for case-positive blocks and neighbourhoods always higher (all p<0.05) than controls; after outbreak, indices similar.	Before outbreak, no significant ORs when predicting cases. During outbreak, all BIs (OR 3-5) significantly predicted outbreaks in blocks & presence of single positive container associated with higher risk (OR 3) for dengue transmission. Vector indices significantly correlated with positive/ negative blocks and neighbourhoods.
	Havana, Cuba (182,485 = 5,228/km2)	BI, HI, BImax (calculated at the block, neighbourhood and health area levels)
		IgM serology
30	Chadee, 2009	Longitudinal study of house infestations within 48hr of dengue clinical diagnosis (33 confirmed case houses), each used as an index house. One house at each cardinal point was investigated including indoor and outdoor containers. Indices compared with routine quarterly vector surveillance indices	Study conducted to determine the mosquito indices when dengue transmission occurred.	Study conducted within the months June-November 2004 (dengue season). All houses inspected quarterly (retrospective data) and within 48hrs of suspected/confirmed reported case.	Significant differences found between number of +ve houses at East and West vs. North and South. Significantly more immatures collected during case investigations than routine. 66% of index houses were +ve for larvae. HI 16% and BI 66 were much higher than routine surveillance and above ‘critical thresholds’. PppI doubled during case detection.	Sample size and environment may significantly affect ability to draw concise conclusions. What can be said is that significantly higher collections occur during active entomologic surveillance vs. passive. No conclusions drawn between cases and indices.
	Trinidad, West Indies (256, 533)	HI, BI, CI, PI, Pupae per person index (PppI)
		Clinical WHO definition. DHF confirmed by serology, IgM.
31	Pham et al., 2011.	Ecological	Describe the occurrence of dengue and its associated ecological factors (incl. indices).	Cases recorded weekly from 2004 – 2008. Entomological data collected monthly from 2004 – 2008 and then averaged across the years for each month then compared with respective dengue case data. HI and CI involved quantifying larvae or pupae to generate the index.	Epidemic in 2004 that accounted for 71.4% of cases. Per 5% increase, the risk of dengue incidence using univariate analysis was 1.66, 1.16, 1.78 and 1.57 for household index, household mosquito, container index and Breteau index respectively. Multivariate analysis showed increased risk at 1.87 and 1.08 for household index and household mosquito (unknown index) accordingly. Temperature and rainfal…	Clear associations between the various indices, seasonal climatic factors and dengue incidence. However, after multivariate analysis, only HI and household mosquito, although it is not clear what the latter is a measure of nor how it was calculated. Moreover, the RR 1.87 and 1.08 per 5% increase for each index respectively. Note that the indices included larval and pupal stages in sampling.
	Dak Lak, Vietnam (1,740,000)	HI, CI, BI calculated
		Health stations report cases. WHO case definitions, no serology.
32	Gurtler et al., 2009	Controlled trial. Cases in neighbouring Paraguay used as external control.	City-wide control programme aimed at reducing the risk of occurrence of autochthonous cases of dengue in Clorinda using vector control strategies.	Immature inspection between Nov-Dec 2002. 14 focal intervention cycles conducted between Oct 2003 - Jun 2007 every four months. HI and BI collected at during same time period.	Neighbourhood BI decrease after first focal cycle (not significant). Conversely, HI did decrease (significant). BI distribution taken at the neighbourhood level was highly skewed indicating focal nature/’hot spots’. 30% of variance in BI cannot be explained by covariates but due to neighbourhood-specific characteristics. Larvae/pupae were predominantly Ae. aegypti. Citywide HI decreased from13.7%…	Authors conclude that larval indices could not be kept below target levels, especially during summer yet did exert a significant impact on larval population. Sustained community acceptance achieved. Most likely averted new outbreaks during the years 2003-2006 and limited the 2007 outbreak. Dengue cases cannot be reliably compared with Paraguay, whose reporting system may be different and whose da…
	Clorinda, Argentina ( 47,250 (2001) 49,000 (2007))	Reportable disease but no case definitions. Uses municipality data(?) and data from previous studies		Cases were not recorded simultaneously, and only annual data were provided by the council (suspected and confirmed) which was then retrospectively visually correlated using graphical outputs with entomological indices. Cases were confirmed with neighbouring country Paraguay over the same time period. Note: Paraguay used country statistics vs. Clorinda city data. Daily commuters crossing the borde…
		HI, BI.
33	Katyal et al., 2003	Longitudinal study	To monitor larval density of Aedes aegypti and dengue cases to study the trends and prevent any recurrence of an outbreak.	Monthly entomological data from 1996 - 2001. Annual incidence data until 2000 and monthly incidence during 2001.	DF/DHF cases decreased from 10252 and 423 deaths in 1996 to 180 cases and 2 deaths in 2000. HI declined from 16.1% in 1996 to 5.3% in 2000. BI and CI also showed a similar decline (no stats available for any of these figures). However, during 2001, increasing trend in cases (322 + 3 deaths) despite low HI (4.2%).	DF/DHF in Delhi is a local/focal phenomenon which emphasizes the need for identification of such potential disease foci. Prevention and control by health education and supported by strict legislative measures at local level can help in lowering the risk of DF/DHF. For detection of Aedes aegypti foci, new surveillance tools at micro level are required to be of any predictive value.
	Undefined sentinel sites in Delhi, India (13,782,976)	HI, CI, BI calculated monthly. DF/DHF hospital case data (WHO clinical definition).
		Case-control study?.
	Undefined sentinel sites in Delhi, India (13,782,976)	HI, CI, BI calculated monthly | DF/DHF hospital case data (WHO clinical definition).
34	Chadee et al., 2005 | Trinidad, West Indies, 1998	Case-control | Cases | BI	Examine the impact of routine vector control operations during the 1998 outbreak of DF/DHF.	January – December 1998 all data (clinical and lab confirmed) collected from Trinidad Public Health Lab and National Surveillance Unit of the MoH. Households visited four times per year, once every three months for inspection and treatment.	Significantly more cases in rainy season. BI around houses of 87/114 DHF cases and respective control was >5 in all but six cases. BI was >10 for 75% of DHF cases. By way of comparison, control BI averaged 5.4 +/-1.83, which was significantly lower than that for DHF cases in 84/87 cases (p<0.0001).	BI was above 5 in all counties throughout the year and increased during rainy season. Vector control failed to reduce to below this level (may be due to resistance/poor application). High density and incidence of DF was +vely correlated with peak rainfall. Suggest pre-seasonal approach at the beginning of the rainy/wet season. Provision of reliable water supply long-term goal. Protective covers m…
35	Romero-Vivas & Falconar, 2005	Longitudinal	Identify correlations between and within indices, rainfall and DF-like illness. Also tested for associations between site location and container type (covered/uncovered) - if an effect on breeding and indices.	Weekly ovitraps performed for 6-month period in 120 premises. Monthly surveys for adult females in same houses by 2 workers during 2nd week of each month from July 1996 – Jan 1997. Monthly larval surveys were also performed but only considered L4 larvae and pupae in final counts.	Geometric mean number of eggs per premise was 73.4 (ODI). 98.2% of premises were positive for 1 egg during any of the weekly inspections within a month.	Positive temporal correlations were only observed between the LDI and the PDI (r = 0.90, DF = 5, and P > 00.5) and the Breteau and House indices (r = 0.86, DF = 5, and P> 0.01). No other correlations were found between these indices and any of the other density indices or the incidence of suspected DF cases in residents, the temperature, the rainfall, or seasonal fluctuations.
	Puerto Triunfo, Colombia, 1996 – 1997 (2,370)	Ovitraps (Ovitrap premise index and ovitrap density index (ODI)); L4 and pupae counted for larval indices (LPI, larval density index (LDI), pupal density index (PDI), PPI); Mouth aspirators and torches for 15min used to generate API and ADI			House (Premise) Index = 43% BI 59.9 for the area, CI 20.6%.
		DF-like cases were reported and serum samples collected. Subsequent serology, RT-PCR or virus isolation used to confirm cases.			High numbers of adult females collected during Jan (driest month). Lowest number of adults collected during a wet month (no statistics). Positive temporal correlation between PDI and LDI (r=.9, p<0.005). No correlations found between any remaining indices nor all indices and dengue-like cases.
36	Foo et al., 1985	Longitudinal	Investigate possible association between rainfall and dengue incidence, and relationship between rainfall, vector abundance, and dengue infection during 1982.	80-100 houses surveyed between Jan and Dec 1982. These data were correlated with Selangor case data.	Positive correlations of 0.432 and 0.351 were observed between dengue incidence and HI and BI, but were not significant.	Average lifespan of Aedes is between 2 and four weeks. Rainfall and dengue incidence model was based on Aedes estimate lifespan of 3 months.
	Selangor, Malaysia, 1982(N/K)	HI, BI				Final data on positive correlation between HI and BI was insignificant at .05 level. Unknown r2.
		Serology using modified haemagglutination inhibition.				Author suggests that role of Aedes albopictus could have confounded results alongside active control methods.
37	Sulaiman et al., 1996	Longitudinal study	Find relationship between BI and HI and cases of DF/DHF.	Year of 1994. Monthly surveys of Kuala Lumpur per pre-defined area (6) to collect data for indices. Hospital reported cases were serotyped and compared across the same time period.	Correlation coefficient for BI and dengue cases was not significant in any zone apart from the city centre where r= 0.6 at p<0.05.	Environmental and social difference between 6 zones.
	Kuala Lumpur, Malaysia 1994 (1.2 million)	Aedes aegypti and albopictus were pooled to form the HI and BI			HI was non-significant across all zones apart from the city centre where r=0.61 and p<0.025.	Author concludes that cases of DF/DHF occurred in all zones despite low BI and HI and seems unlikely that outbreaks of DHF can be explained by entomological increases during the wet season.
		Cases were confirmed using haemagglutination inhibition test. Positive cases followed by fogging with cyfluthrin.				Overall, BI and HI were significantly positively correlated with DF cases in city centre zone only.
38	Honorio et al., 2009	Longitudinal	Model spatial patterns of dengue seroprevalence in 3 neighbourhoods with difference socioeconomic profiles in Rio de Janeiro (urban, suburban, slum).	Surveys performed in 3 neighbourhoods, which differed in population density, sanitation, vegetation cover and history of dengue.	Confirmed dengue number of cases very low and consequently not statistically modelled.	No data tables provided for national data.
	Rio de Janeiro, Brazil 2006-2008 (0.25km2 in each of the 3 areas Total pop = 8346)	Mean Adult Density (MDI) and Mean Egg Density (MED), BI		Serological surveys conducted July – November 2007 and Feb- April 2008.	Largest increase in notified dengue cases began in Dec 2007 (case definition not provided as these are national data) and not preceded by increase in vector density a measured by study. BI varied widely between 3.30 – 20.51 across the three areas.	Large range in BI across areas indicates variable nature of mosquito habitats according to environment.
		Serology (IgM, IgG)		Ento surveillance weekly from 6th September 2006 –March 24th 2008. April 2007 – March 2008 aggregated to form one index.	No statistically significant ORs in Higienopolis, urban area, for spatial distribution of seroprevalence. Tubiacanga, suburban area, presented similar variation in spatial OR, with high OR 3.0 in middle of map. Palmares, suburban slum, observed highest difference in seroprevalence distribution. OR = 56 on northeast side where main access to the community is located. Towards south, protective effe…	Concluded that recent dengue infection in residences with low mosquito densities suggests infection took place elsewhere. Large spatial heterogeneity in dengue seroprevalence.
				BI measured in March June August Nov 2007 and Jan April 2008 was collected by Rio Public Health Office.	Higienopolis, significantly high mosquito density areas were found. Only one of four new infections found inside or close to this area.	Hypothesised that isolated human populations too small to maintain dengue virus endemically and that observed seroprevalence results from multiple infections with various viruses throughout last 20 years. Public spaces seemed to concentrate recent dengue infections.
					Tubiancanga spatial variability in mosquito density was small, RR going up to 3. Recent infections spread evenly throughout (no stats).	Results may point to variable nature of dengue transmission, important interplay between person density, movement and mosquito density.
					Slum showed smallest variation, mosquito density spread evenly throughout.
39	Rubio-Palis et al., 2011	Longitudinal	To research the impact of the climatic variables on the cause of dengue and the abundance of Ae. aegypti in the metropolitan area of Maracay (AMM) for the 1997-2005 period, with the aim of generating trusted information that contributes to the design and application of strategies for the prevention and control of dengue outbreaks.	Monthly samples between Nov 2000 and Dec 2001 from the areas within and around where there were clinical cases prior to fumigating interventions.	Pearson correlation analysis showed that a positive correlation existed between rainfall and dengue cases for every year (P<0.001). Something similar is observed in the year 2001, in which exists a positive correlation between one and six weeks. Unlike the year 2005 where a positive correlation (P<0.0001) only existed in week 3 and 4.	Author: Results are not generalizable to any house but simply to those with positive cases and the houses around them in the areas considered in the study. Positive correlation between Ae. aegypti abundance and rainfall, noting that the largest abundance in the month of August (14.7 Aedes/house).
	Maracay, Venezuela 1997-2005	Number of female Aedes per house. Use of entomological data from Urdaneta et al. (2005) – need to follow up
		Serology for probably case and virus isolation/RTPCR for confirmed. All data obtained from Regional Laboratory of Diagnosis and Research on Dengue and other Viral Diseases (LARDIDEV, 1997-2005).
40	Lin & Wen, 2011	Longitudinal. Li (lowest admin unit in Taiwan) used as unit of measure	Conducted to evaluate the hypothesis that spatial heterogeneity existed for dengue-mosquito and dengue-human relationships.	On average, larval habitats in each Li were surveyed once per month.	Ordinary least squares (OLS) and geographically weighted regression (GWR) models used.	Global OLS model only explained 4% of total variance of IR. GWR model explained 59% of variance.
	Kaohsiung/Fengshan Cities, Taiwan (Kaoh., 1.5million, Feng., 330,000)	CI, BI (estimated on a monthly basis for each Li)			1 unit increase of BImax results in 947.93 increase in average IR with OLS model.	Note that R2 value ranged from 0.0 – 0.33, this is very broad and quite low, with the majority of areas between 0.03 – 0.18.
		IgM/IgG ELISA or DENV RT-PCR.			Although GWR model described the variance to a better degree no coefficients described. GWR coefficient of POPden and BImax had R2 or 0.01. R2 was not homogeneously distributed in all Lis.	Study provides further evidence that relationships between max Breteau Index, population density and dengue incidence were spatially non-stationary. Higher human densities lead to higher incidence.
41	Chaikoolvatana et al., 2007	Longitudinal study	To develop a geographical information system for surveillance of Aedes aegypti and dengue haemorrhagic fever in north-eastern Thailand.	Feb to Jul 2007; frequency unknown. All data collection conducted by local authorities.	No tabular data and only 4 precise figures detailing indices in specific villages.	The results show that the number of DHF cases increased during the high disease incidence period compared to the low disease incidence period, suggesting a positive correlation between the peak rainfall period in June-July and the high density of Ae. aegypti mosquitoes and high incidence of DHF cases.
	Ubon Ratachthani, Thailand 2007 (1.6 million 103 people/km2)	CI, HI, BI **			Need to correlate dengue cases and indices manually to derive meaningful data.
		WHO case definition for DHF cases only **			Authors have displayed village ento data and province case data.
		** Both datasets collected by the Office of Disease Prevention and Control.
42	Chadee et al., 2007	Longitudinal	The aim of this 3-year study was to explore the impact of climate variability on the incidences of DF and DHF and on vector densities in Trinidad.	1st Jan 2002 – 31 Dec 2004. Attempts made at inspecting all natural and artificial containers in every house and compound in Trinidad.	Warm seasons in 2002 and 2003 but not 2004 were significantly associated with relatively high BI and peaks in incidence of DF. Majority of cases 80%, 80.9% and 79.4% recorded in 2002, 2003 and 2004 respectively, occurred during rainy season p<0.001. Level of dengue-virus transmission to humans peaked as rainfall peaked in 2002 and 2003, but links were less obvious in 2004. 99% of mosquitoes were …	Most (80%) of the DF cases recorded during the present study were reported during the rainy season when the BI for Ae. aegypti ranged between 20 and 46 — that is, four to nine times higher than the BI of 5 thought to represent the threshold for dengue transmission (Macdonald, 1956). The generally high monthly BI recorded in Trinidad also indicate that the numbers of Ae. aegypti pupae/person also …
	Trinidad 2002-2004	HI calculated from quarterly visits (73% of Trinidad). BI calculated from monthly visits by different team (10 houses in each county).
		DF and DHF cases. Blood samples taken from suspected cases for serological testing however clinical diagnoses were accepted in lieu of these tests due to workload. All suspected cases of DHF were confirmed by virus isolation or IgM.
43	Correa et al., 2005	Ecological	To analyse the association between disease incidence and vector infestation; adopted an ecological approach using spatial areas comprising sanitary districts and basic health units.	Results of HI were aggregated by sanitary district and municipality. 17 surveys during 1996 – 2001. Results were aggregated into 4 groups, Group 1 was the value of HI below the first quartile. Group 2 the PI was equal or greater than the first quartile and below the median. Group 3 the PI was equal to or greater than the median below the 3rd quartile. Group 4 PI was equal to or greater than the 3…	In the first 2 years analysed, the majority of cases occurred in the district of Venda Nova. In the first semester of 1996, 50% equal to 60 areas of coverage presented PI greater than 3.9%. And in the second semester of that year, 75% equal to 80 areas of coverage had the PI below 1.5%. In the vector survey done between Feb and April of 1997 it was observed that 505 equal to 53 areas presented PI…	In October 1997 no reduction in vector infestation. The PI in the district varied from 2.1% to 10.7% and 25% equal to 30 areas of coverage had the PI above 6.5%. In between June 1998 and October 2000, there was a progressive drop in the mean PI estimated for the municipality, district and health areas. In the year of 2001, the PI rose. In the present study, using data obtained from the secondary …
	Belo Horizonte, Brazil	HI (obtained from external source - service for the control of zoonoses)
		IgM virus isolation and PCR
44	Fernandez et al., 2005	Longitudinal study	To determine the population behavior of larval Aedes aegypti to explain fluctuations through three entomological indexes (EI) and estimate the suspected cases of dengue in the city of Yurimaguas, Loreto, Peru between 2000 and 2004.	Apr, May, Jun, Jul, Oct, Nov (2000); Mar, Aug, Dec (2001); Apr, Aug, Dec (2002);Mar, Jul, Dec (2003); Mar, Aug, Dec (2004).	During the 2001-2004 period there were significant differences for the AI (p = 0.01), IR (F p = 0.00) and IB (p = 0.02) (Figure 2a, b, c). The 3 highest IE values was in 2000. For the three entomological indexes that showed a decreasing trend from 2000 to 2002, but a slight increase from 2003 to 2004, although this was not significant.	Regressions were performed to estimate CDT and CDI from AI and BI, but only four regression models to estimate the CDT from monthly mean values of IA were valid, as the significance in all cases was 0.01 to 0.04 (Table 2), although the coefficients (R2) for the equations were relatively low (between 0.08 and 0.13). The linear, quadratic and cubic with and without logarithmic transformation to est…
	Yurimagas, Peru. 2000-2004 (58 627)	HI, CI, BI			Dengue cases registered in 60 months (2000 to 2004), decreased from 15.5 cases per month (2000) to 7.5 (2001), 3.0 (2002) and 3.91 (2003), but then there was an increase in 2004 to 10.66 cases per month. Differences exist between 2000 and 2002 (p = 0.02). No differences between the average total monthly dengue (100%) for the twelve months of the year in the study period 2000 to 2004 (p = 0.17) (F…
		Cases confirmed by serology.			The three entomological indexes: IA, IB and IR were highly correlated linearly and positively during the period 2000 to 2004.
45	Arboleda et al., 2012	Mathematical model | Presence of +ve container (+ve for immatures) in house = +ve house | BI	Evaluate the degree to which ecological niche models are able to anticipate the dynamics of breeding by Aedes aegypti, both across the region and through time, and whether breeding suitability patterns of this vector species translate into variation in human dengue case frequency through time. As part of this aim, compare the performance of niche models as predictors of human dengue case frequenc…	Dirección Local de Salud de Bello (DLSB) - samples of 5,709-13,137 houses randomly two to four times yearly to examine water containers and evaluate and eliminate possible mosquito breeding sites. A total of 5,709 houses was visited and sampled for mosquitoes, and 2,300 yielded records of Ae. aegypti, of which 2,075 could be georeferenced satisfactorily (i.e., to a precision of ≤20 m) over the s…	The prediction of mosquito breeding sites can be used to anticipate concentrations of human dengue cases. Results showed a statistically significant positive correlation between area predicted as suitable by models and dengue case rates (P < 0.05; Table 5) in all years except 2005 and 2008. However, BI was not related significantly to dengue case rates in any year (all P > 0.05; Table 5). Proport…	Although both niche modeling algorithms performed well in these initial tests, comparative studies of Maxent and GARP have shown that results differ at some level (Peterson et al. 2007); however, areas predicted as suitable by the two algorithms coincided closely, at least in broad outlines. In 2008, the two models matched only by 44.3%; however, for the other years, the match ranged 67.2- 76.1%.…
	Belo, Antioquia, Colombia | 371,973	Dengue case information provided by local health entities with positive cases those 'that met WHO definitions as at least “suspected” cases (WHO 1997)'.
